# Supplementary material
Source: PubMed Central journal article supplement (PMC5965281)
Supplement: NIHMS947183-supplement-Supp_figS1.pdf [file NIHMS947183-supplement-Supp_figS1.pdf]

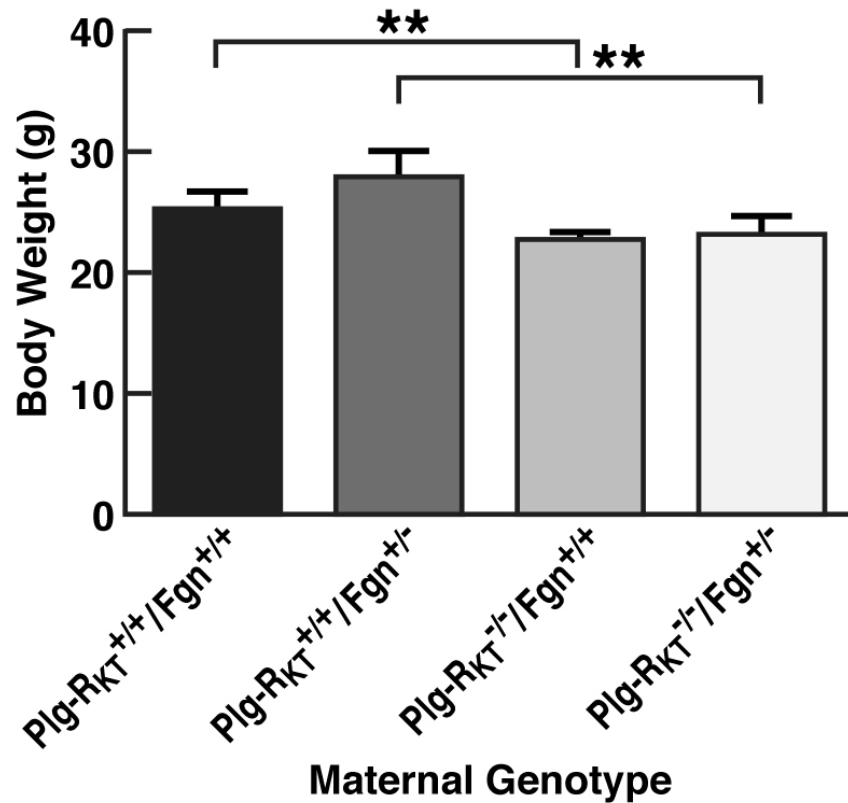

**Supplementary Figure S1.** Effect of fibrinogen heterozygosity on body weight. Body weights of Plg-R<sub>KT</sub><sup>+/+</sup>/Fgn<sup>+/+</sup>, Plg-R<sub>KT</sub><sup>+/+</sup>/Fgn<sup>+/-</sup>, Plg-R<sub>KT</sub><sup>-/-</sup>/Fgn<sup>+/+</sup> and Plg-R<sub>KT</sub><sup>-/-</sup>/Fgn<sup>+/-</sup> female littermates were determined by weighing mice 2 days postpartum. ANOVA revealed group differences: F=11.68, P<0.0001. \*\*=P< 0.05 by Student -Newman-Keuls post hoc testing, n=4-5.
