# Supplementary material
Source: PubMed Central journal article supplement (PMC5965281)
Supplement: NIHMS947183-supplement-Supp_figS2.pdf [file NIHMS947183-supplement-Supp_figS2.pdf]

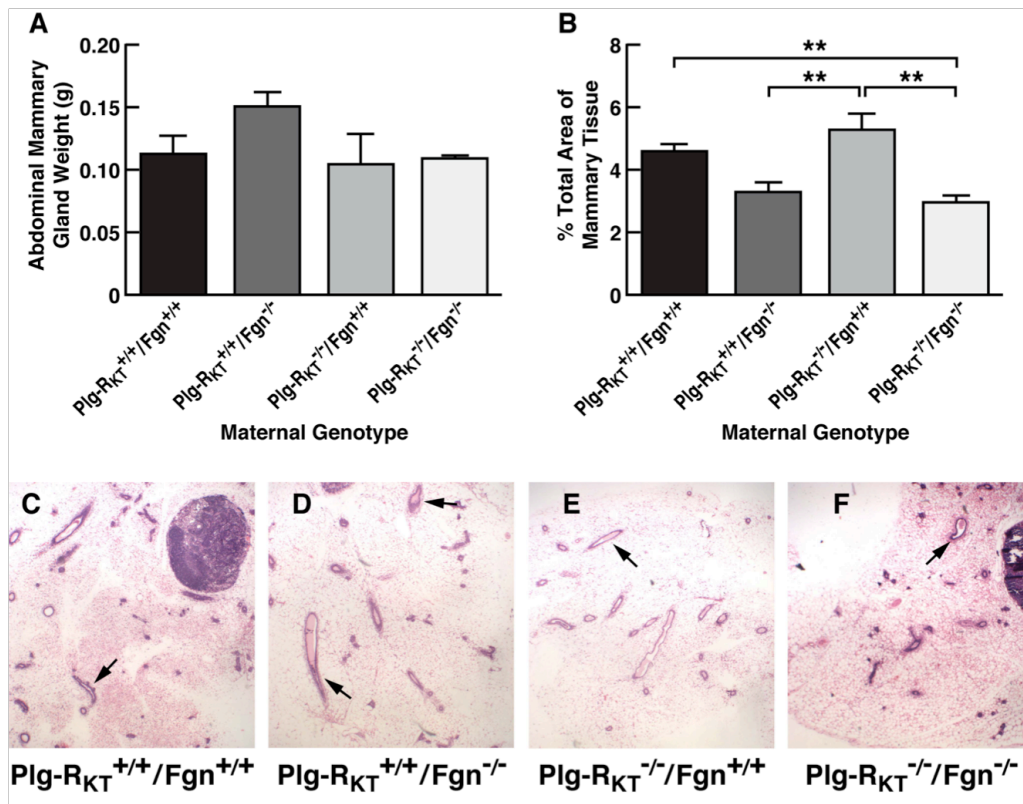

**Supplementary Figure S2.** Effect of fibrinogen homozygosity on alveolar development at day 8 of pregnancy. Mice were mated and pregnancy initiation was determined by examination of vaginal plugs. Alveolar mammary glands were collected from primiparous Plg-R<sub>KT</sub><sup>+/+</sup>/Fgn<sup>+/+</sup>, Plg-R<sub>KT</sub><sup>+/+</sup>/Fgn<sup>-/-</sup>, Plg-R<sub>KT</sub><sup>-/-</sup>/Fgn<sup>+/+</sup> and Plg-R<sub>KT</sub><sup>-/-</sup>/Fgn<sup>-/-</sup> female littermates at day 8 of pregnancy and **(A)** weighed.  $P=0.3786$ ,  $F=1.143$  by ANOVA.  $n=6$  Plg-R<sub>KT</sub><sup>+/+</sup>/Fgn<sup>+/+</sup>,  $n=3$  Plg-R<sub>KT</sub><sup>+/+</sup>/Fgn<sup>-/-</sup>,  $n=3$  Plg-R<sub>KT</sub><sup>-/-</sup>/Fgn<sup>+/+</sup> and  $n=2$  Plg-R<sub>KT</sub><sup>-/-</sup>/Fgn<sup>-/-</sup>. **(B)**, Per cent total mammary area occupied by epithelia was determined by morphometry as described in the legend to Figure 3 **(B)**. ANOVA revealed group differences:  $F=10.53$ ,  $P<0.0001$ .  $**=P<0.05$  by Student -Newman-Keuls post hoc testing,  $n=15$  for each genotype. Histology of abdominal mammary glands of Plg-R<sub>KT</sub><sup>+/+</sup>/Fgn<sup>+/+</sup> **(C)**, Plg-R<sub>KT</sub><sup>+/+</sup>/Fgn<sup>-/-</sup> **(D)**, Plg-R<sub>KT</sub><sup>-/-</sup>/Fgn<sup>+/+</sup> **(E)** and Plg-R<sub>KT</sub><sup>-/-</sup>/Fgn<sup>-/-</sup> **(F)** mice harvested at day 8 of pregnancy and stained with H&E. Slides are representative of each genotype. Images were obtained with a Keyence BZ9000 (magnification X 40)
