# Supplementary material
Source: PubMed Central journal article supplement (PMC5965281)
Supplement: NIHMS947183-supplement-Supp_TableS1.pdf [file NIHMS947183-supplement-Supp_TableS1.pdf]

Supplementary Table 1. qPCR array analysis of lactating mammary glands

| Gene Name                                                       | Gene Symbol | Fold Change | P value         |
|-----------------------------------------------------------------|-------------|-------------|-----------------|
| Actin, alpha 2, smooth muscle, aorta                            | Acta2       | 1.007       | 0.952921        |
| Angiotensinogen (serpin peptidase inhibitor, clade A, member 8) | Agt         | -0.3811     | 0.059663        |
| Thymoma viral proto-oncogene 1                                  | Akt1        | -0.3618     | <b>0.000694</b> |
| B-cell leukemia/lymphoma 2                                      | Bcl2        | 5.6962      | 0.072379        |
| Bone morphogenetic protein 7                                    | Bmp7        | 1.7983      | 0.138452        |
| Caveolin 1, caveolae protein                                    | Cav1        | 1.8921      | 0.125982        |
| Chemokine (C-C motif) ligand 11                                 | Ccl11       | 3.1095      | 0.082774        |
| Chemokine (C-C motif) ligand 12                                 | Ccl12       | 14.9458     | 0.064527        |
| Chemokine (C-C motif) ligand 3                                  | Ccl3        | 4.2428      | 0.073532        |
| Chemokine (C-C motif) receptor 2                                | Ccr2        | 1.3441      | 0.456906        |
| CCAAT/enhancer binding protein (C/EBP), beta                    | Cebpb       | 1.1408      | 0.502797        |
| Collagen, type I, alpha 2                                       | Col1a2      | 2.042       | 0.251634        |
| Collagen, type III, alpha 1                                     | Col3a1      | 1.2834      | 0.515132        |
| Connective tissue growth factor                                 | Ctgf        | 9.6688      | <b>0.000493</b> |
| Chemokine (C-X-C motif) receptor 4                              | Cxcr4       | 3.2528      | 0.222168        |
| Decorin                                                         | Dcn         | 2.8812      | 0.161542        |
| Endothelin 1                                                    | Edn1        | 4.7955      | <b>0.008408</b> |
| Epidermal growth factor                                         | Egf         | -0.0824     | <b>0.000275</b> |
| Endoglin                                                        | Eng         | 1.2614      | 0.414352        |
| Fas ligand (TNF superfamily, member 6)                          | Fasl        | 5.2054      | 0.071413        |
| Gremlin 1                                                       | Grem1       | 3.5472      | <b>0.043376</b> |
| Hepatocyte growth factor                                        | Hgf         | 6.2477      | <b>0.033817</b> |
| Interferon gamma                                                | Ifnf        | 3.7408      | <b>0.040548</b> |
| Interleukin 10                                                  | Il10        | 3.7408      | <b>0.040548</b> |
| Interleukin 13                                                  | Il13        | 3.7408      | <b>0.040548</b> |
| Interleukin 13 receptor, alpha 2                                | Il13ra2     | 3.7408      | <b>0.040548</b> |
| Interleukin 1 alpha                                             | Il1a        | 9.8492      | <b>0.027769</b> |
| Interleukin 1 beta                                              | Il1b        | 0.9942      | 0.686127        |
| Interleukin 4                                                   | Il4         | 3.8371      | <b>0.032809</b> |
| Interleukin 5                                                   | Il5         | 3.7408      | <b>0.040548</b> |
| Integrin linked kinase                                          | Ilk         | 1.3195      | 0.283108        |
| Inhibin beta E                                                  | Inhbe       | 3.7408      | <b>0.040548</b> |
| Integrin alpha 1                                                | Itga1       | 1.674       | 0.250108        |
| Integrin alpha 2                                                | Itga2       | 15.9078     | <b>0.008316</b> |
| Integrin alpha 3                                                | Itga3       | 2.2527      | 0.053860        |
| Integrin alpha V                                                | Itgav       | 0.8888      | 0.549481        |
| Integrin beta 1 (fibronectin receptor beta)                     | Itgb1       | 2.4312      | <b>0.028570</b> |
| Integrin beta 3                                                 | Itgb3       | 10.2083     | <b>0.020274</b> |
| Integrin beta 5                                                 | Itgb5       | 0.9472      | 0.959936        |
| Integrin beta 6                                                 | Itgb6       | 3.9586      | <b>0.009633</b> |
| Integrin beta 8                                                 | Itgb8       | 11.3006     | <b>0.017041</b> |
| Jun oncogene                                                    | Jun         | 5.0982      | <b>0.045830</b> |
| Lysyl oxidase                                                   | Lox         | 2.3674      | 0.254695        |
| Latent transforming growth factor beta binding protein 1        | Ltbp1       | 16.526      | <b>0.005177</b> |
| Matrix metalloproteinase 13                                     | Mmp13       | 1.9075      | 0.208027        |
| Matrix metalloproteinase 14 (membrane-inserted)                 | Mmp14       | 2.5609      | 0.190697        |
| Matrix metalloproteinase 1a (interstitial collagenase)          | Mmp1a       | -0.2701     | <b>0.003133</b> |
| Matrix metalloproteinase 2                                      | Mmp2        | 5.2174      | <b>0.027138</b> |
| Matrix metalloproteinase 3                                      | Mmp3        | 5.0982      | 0.088642        |

|                                                                            |           |         |                 |
|----------------------------------------------------------------------------|-----------|---------|-----------------|
| Matrix metalloproteinase 8                                                 | Mmp8      | 3.7408  | <b>0.040548</b> |
| Matrix metalloproteinase 9                                                 | Mmp9      | 3.1456  | <b>0.028853</b> |
| Myelocytomatosis oncogene                                                  | Myc       | 1.1096  | 0.597355        |
| Nuclear factor of kappa light polypeptide gene enhancer in B-cells 1, p105 | Nfkb1     | 2.9316  | 0.062971        |
| Platelet derived growth factor, alpha                                      | Pdgfa     | 1.6818  | 0.122744        |
| Platelet derived growth factor, B polypeptide                              | Pdgfb     | 2.558   | <b>0.048603</b> |
| Plasminogen activator, tissue                                              | Plat      | 1.8532  | 0.313317        |
| Plasminogen activator, urokinase                                           | Plau      | 2.1386  | 0.080600        |
| Plasminogen                                                                | Plg       | 3.7408  | <b>0.040548</b> |
| Serine (or cysteine) peptidase inhibitor, clade A, member 1a               | Serpina1a | 3.7408  | <b>0.040548</b> |
| Serine (or cysteine) peptidase inhibitor, clade E, member 1                | Serpine1  | 3.3096  | <b>0.049194</b> |
| Serine (or cysteine) peptidase inhibitor, clade H, member 1                | Serpinh1  | 1.9408  | <b>0.043046</b> |
| MAD homolog 2 (Drosophila)                                                 | Smad2     | 2.2763  | <b>0.038846</b> |
| MAD homolog 3 (Drosophila)                                                 | Smad3     | 0.9255  | 0.734813        |
| MAD homolog 4 (Drosophila)                                                 | Smad4     | 1.9097  | 0.076663        |
| MAD homolog 6 (Drosophila)                                                 | Smad6     | 2.3593  | 0.073593        |
| MAD homolog 7 (Drosophila)                                                 | Smad7     | 1.1851  | 0.421310        |
| Snail homolog 1 (Drosophila)                                               | Snai1     | 3.7408  | <b>0.040548</b> |
| Trans-acting transcription factor 1                                        | Sp1       | 1.6491  | 0.213203        |
| Signal transducer and activator of transcription 1                         | Stat1     | 2.4284  | 0.161467        |
| Signal transducer and activator of transcription 6                         | Stat6     | 1.8899  | 0.118409        |
| Transforming growth factor, beta 1                                         | Tgfb1     | 3.685   | 0.100396        |
| Transforming growth factor, beta 2                                         | Tgfb2     | 0.984   | 0.823493        |
| Transforming growth factor, beta 3                                         | Tgfb3     | 8.4757  | <b>0.007080</b> |
| Transforming growth factor, beta receptor I                                | Tgfr1     | 2.6057  | <b>0.047837</b> |
| Transforming growth factor, beta receptor II                               | Tgfr2     | 1.4777  | 0.226295        |
| TGFB-induced factor homeobox 1                                             | Tgif1     | 2.5111  | 0.127256        |
| Thrombospondin 1                                                           | Thbs1     | 10.5317 | 0.111944        |
| Thrombospondin 2                                                           | Thbs2     | 3.4621  | 0.177138        |
| Tissue inhibitor of metalloproteinase 1                                    | Timp1     | 1.9521  | 0.121686        |
| Tissue inhibitor of metalloproteinase 2                                    | Timp2     | 6.5887  | <b>0.023249</b> |
| Tissue inhibitor of metalloproteinase 3                                    | Timp3     | 2.5315  | 0.085443        |
| Tissue inhibitor of metalloproteinase 4                                    | Timp4     | -0.4132 | <b>0.014459</b> |
| Tumor necrosis factor                                                      | Tnf       | 5.278   | <b>0.019857</b> |
| Vascular endothelial growth factor A                                       | Vegfa     | 1.6663  | 0.134336        |
| Actin, beta                                                                | Actb      | -0.4983 | 0.100008        |
| Beta-2 microglobulin                                                       | B2m       | 1.4093  | 0.297612        |
| Glyceraldehyde-3-phosphate dehydrogenase                                   | Gapdh     | 0.8615  | 0.930723        |
| Glucuronidase, beta                                                        | Gusb      | 1.0595  | 0.676636        |
| Heat shock protein 90 alpha (cytosolic), class B member 1                  | Hsp90ab1  | 1.6529  | 0.116296        |
| Mouse Genomic DNA Contamination                                            | MGDC      | 3.7408  | <b>0.040548</b> |
| Reverse Transcription Control                                              | RTC       | 4.084   | <b>0.029252</b> |
| Reverse Transcription Control                                              | RTC       | 4.0232  | <b>0.031952</b> |
| Reverse Transcription Control                                              | RTC       | 4.1843  | <b>0.027501</b> |
| Positive PCR Control                                                       | PPC       | 1.9816  | 0.189524        |
| Positive PCR Control                                                       | PPC       | 2.1263  | 0.188895        |
| Positive PCR Control                                                       | PPC       | 1.977   | 0.176254        |

**Bold P<.05 significant, n=3**
